# Supplementary material
Source: publisher figshare collection journal article supplement (https://karger.figshare.com/ndownloader/files/8718082)
Supplement: Supplementary file 1 [file 8718082]

**Supplementary Table 1**.Clinicopathologic characteristics of the patients according to the status of blood transfusion at primary surgery.

|  |  | Blood Transfusion | |  |
| --- | --- | --- | --- | --- |
| Variables |  | Yes (n=109) | No (n=92) | *p*-value |
| Age | Median (range) | 59(29-84) | 58(34-77) | 0.18 |
| Clinical stage | I | 100(92%) | 85(92%) | 0.99 |
|  | II | 9(8%) | 7(8%) |  |
| Surgical stage | I | 80(74%) | 73(79%) | 0.36 |
|  | II | 8(7%) | 8(9%) |  |
|  | III | 21(19%) | 11(12%) |  |
|  | IV | 0 | 0 |  |
| Histology | Endometrioid, Grade 1 | 60(55%) | 55(60%) | 0.58 |
|  | Endometrioid, Grade 2 | 32(29%) | 22(24%) |  |
|  | Endometrioid, Grade 3 | 12(11%) | 7(8%) |  |
|  | Serous | 2(2%) | 1(1%) |  |
|  | Clear cell | 1(1%) | 3(3%) |  |
|  | Others* | 2(2%) | 4(4%) |  |
| Myometrial invasion | < 1/2 | 75(69%) | 75(82%) | 0.051 |
|  | ≧1/2 | 34(31%) | 17(18%) |  |
| Lymph-vascular invasion | positive | 49(45%) | 21(23%) | <0.01 |
|  | negative | 60(55%) | 71(77%) |  |
| Cervical involvement | positive | 10(9%) | 6(7%) | 0.60 |
|  | negative | 99(91%) | 86(93%) |  |
| Peritoneal washing cytology | positive | 12(11%) | 7(8%) | 0.47 |
|  | negative | 97(89%) | 85(92%) |  |
| Lymph node metastasis | positive | 11(10%) | 3(3%) | 0.09 |
|  | negative | 98(90%) | 89(97%) |  |
| Ovarian metastasis | positive | 0 | 2(2%) | 0.21 |
|  | negative | 109(100%) | 90(98%) |  |
| Chemotherapy | done | 54(49%) | 44(48%) | 0.89 |
|  | not done | 55(51%) | 48(52%) |  |
|  |  | * mucinous adenocarcinoma, mixed type | | |
